# Supplementary material for: The Effects of COVID-19 on the Emotional and Social Stability, Motivation and Attitudes of Gifted and Non-Gifted Children in Greece
Source: MDPI journal article supplement (doi:10.3390/children10040706), 2023-04-10
Supplement: s1 [file s1]

**Table S1.** Pre- and post-COVID-19 social and emotional stability in gifted and non-gifted children.

| <b>Display Emotional Balance</b>               |               |     |      |      |
|------------------------------------------------|---------------|-----|------|------|
|                                                |               | N   | Mean | SD   |
| Gifted                                         | pre-COVID-19  | 86  | 52.9 | 10.5 |
|                                                | post-COVID-19 | 145 | 61.1 | 8.3  |
| Non-gifted                                     | pre-COVID-19  | 86  | 53.9 | 9.3  |
|                                                | post-COVID-19 | 612 | 64.5 | 7.0  |
| <b>Perceive a Strong Family Support System</b> |               |     |      |      |
| Gifted                                         | pre-COVID-19  | 78  | 47.6 | 8.4  |
|                                                | post-COVID-19 | 143 | 52.3 | 5.1  |
| Non-gifted                                     | pre-COVID-19  | 83  | 49.5 | 6.0  |
|                                                | post-COVID-19 | 567 | 52.9 | 5.5  |
| <b>Perceive Parents as Supportive</b>          |               |     |      |      |
| Gifted                                         | pre-COVID-19  | 63  | 44.7 | 3.4  |
|                                                | post-COVID-19 | 139 | 44.7 | 7.5  |
| Non-gifted                                     | pre-COVID-19  | 78  | 41.4 | 5.3  |
|                                                | post-COVID-19 | 553 | 46.2 | 6.8  |

(N = total number, M = mean, SD = standard deviation)

**Table S2.** Pre- and post-COVID-19 types of motivators in gifted and non-gifted children.

| <b>Have internal and intrinsic motivators</b> |               |     |      |      |
|-----------------------------------------------|---------------|-----|------|------|
|                                               |               | N   | Mean | SD   |
| Gifted                                        | pre-COVID-19  | 86  | 69.9 | 9.6  |
|                                               | post-COVID-19 | 145 | 73.2 | 6.1  |
| Non-gifted                                    | pre-COVID-19  | 87  | 71.1 | 7.5  |
|                                               | post-COVID-19 | 610 | 74.0 | 8.4  |
| <b>Have internal and external motivators</b>  |               |     |      |      |
| Gifted                                        | pre-COVID-19  | 87  | 58.0 | 7.6  |
|                                               | post-COVID-19 | 144 | 66.4 | 6.1  |
| Non-gifted                                    | pre-COVID-19  | 87  | 57.8 | 7.1  |
|                                               | post-COVID-19 | 613 | 66.5 | 6.8  |
| <b>Lack motivators</b>                        |               |     |      |      |
| Gifted                                        | pre-COVID-19  | 87  | 55.5 | 12.8 |
|                                               | post-COVID-19 | 144 | 43.8 | 10.9 |
| Non-gifted                                    | pre-COVID-19  | 87  | 56.2 | 12.8 |
|                                               | post-COVID-19 | 595 | 39.3 | 11.9 |

(N = total number, M = mean, SD = standard deviation)

**Table S3.** Pre- and post-COVID-19 attitudes in gifted and non-gifted children.

| <b>Display a Condescending Attitude</b> |               |     |      |      |
|-----------------------------------------|---------------|-----|------|------|
|                                         |               | N   | Mean | SD   |
| Gifted                                  | pre-COVID-19  | 86  | 51.5 | 5.6  |
|                                         | post-COVID-19 | 145 | 55.3 | 6.2  |
| Non-gifted                              | pre-COVID-19  | 87  | 49.7 | 5.6  |
|                                         | post-COVID-19 | 627 | 51.8 | 7.0  |
| <b>Display a Conforming Attitude</b>    |               |     |      |      |
| Gifted                                  | pre-COVID-19  | 86  | 46.9 | 7.6  |
|                                         | post-COVID-19 | 145 | 40.2 | 7.3  |
| Non-gifted                              | pre-COVID-19  | 86  | 47.7 | 6.1  |
|                                         | post-COVID-19 | 618 | 41.9 | 6.7  |
| <b>Want Freedom of Choice</b>           |               |     |      |      |
| Gifted                                  | pre-COVID-19  | 73  | 64.3 | 11.6 |
|                                         | post-COVID-19 | 140 | 63.1 | 8.0  |
| Non-gifted                              | pre-COVID-19  | 79  | 61.5 | 9.6  |
|                                         | post-COVID-19 | 563 | 59.2 | 10.2 |
| <b>Display perfectionism</b>            |               |     |      |      |
| Gifted                                  | pre-COVID-19  | 86  | 57.9 | 12.3 |
|                                         | post-COVID-19 | 143 | 70.4 | 12.2 |
| Non-gifted                              | pre-COVID-19  | 87  | 58.5 | 11.1 |
|                                         | post-COVID-19 | 606 | 74.2 | 12.2 |

(N = total number, M = mean, SD = standard deviation)

**Table S4.** Magnitudes of the metrics measured in our study stratified by gender.

| Metric                                  | Non-gifted  |             | Dif.<br>(p value) | Gifted      |             | Dif.<br>(p value) |
|-----------------------------------------|-------------|-------------|-------------------|-------------|-------------|-------------------|
|                                         | Boys        | Girls       |                   | Boys        | Girls       |                   |
| Pre-COVID-19                            |             |             |                   |             |             |                   |
| Display Emotional Balance               | 52.4 ± 11.4 | 56.4 ± 12.2 | p=0.1284          | 52.6 ± 12.7 | 53.5 ± 17.3 | p=0.7938          |
| Perceive a Strong Family Support System | 48.4 ± 9.0  | 51.2 ± 7.7  | p=0.1582          | 47.0 ± 11.3 | 48.8 ± 11.0 | p=0.5151          |
| Perceive Parents as Supportive          | 41.4 ± 9.6  | 41.5 ± 9.9  | p=0.9573          | 45.2 ± 9.6  | 43.8 ± 7.5  | p=0.5481          |
| Have internal and intrinsic motivators  | 56.9 ± 9.2  | 59.5 ± 9.7  | p=0.2226          | 57.4 ± 12.3 | 59.1 ± 11.3 | p=0.5515          |
| Have internal and external motivators   | 69.4 ± 8.9  | 74.3 ± 8.0  | <b>p=0.0135</b>   | 69.7 ± 9.5  | 70.2 ± 10.0 | p=0.8033          |
| Lack motivators                         | 57.2 ± 15.4 | 54.4 ± 17.3 | p=0.4401          | 57.1 ± 16.5 | 52.4 ± 19.4 | p=0.2453          |
| Display a Condescending Attitude        | 50.5 ± 7.1  | 48.2 ± 6.8  | p=0.1580          | 51.1 ± 6.7  | 52.3 ± 7.6  | p=0.4394          |
| Display a Conforming Attitude           | 47.3 ± 7.2  | 48.5 ± 8.6  | p=0.5044          | 47.5 ± 9.5  | 45.9 ± 9.6  | p=0.4476          |
| Want Freedom of Choice                  | 62.8 ± 13.5 | 59.7 ± 16.0 | p=0.3611          | 64.2 ± 14.9 | 64.6 ± 14.5 | p=0.9093          |
| Display perfectionism                   | 56.6 ± 15.1 | 62.1 ± 18.6 | p=0.1417          | 56.1 ± 17.4 | 61.4 ± 21.2 | p=0.2154          |
| Post-COVID-19                           |             |             |                   |             |             |                   |
| Display Emotional Balance               | 64.3 ± 9.7  | 64.8 ± 9.2  | p=0.5181          | 59.8 ± 10.5 | 62.9 ± 11.1 | p=0.0946          |
| Perceive a Strong Family Support System | 51.8 ± 7.5  | 54.2 ± 8.4  | <b>p=0.0003</b>   | 51.3 ± 7.8  | 53.8 ± 7.3  | p=0.0550          |
| Perceive Parents as Supportive          | 45.6 ± 10.3 | 46.9 ± 10.2 | p=0.1467          | 44.3 ± 8.5  | 45.3 ± 9.4  | p=0.5344          |
| Have internal and intrinsic motivators  | 66.6 ± 10.3 | 66.3 ± 10.8 | p=0.8132          | 65.7 ± 8.7  | 67.4 ± 9.6  | p=0.2876          |
| Have internal and external motivators   | 74.0 ± 9.0  | 74.0 ± 8.0  | p=0.9960          | 72.4 ± 7.9  | 74.3 ± 7.2  | p=0.1387          |
| Lack motivators                         | 41.6 ± 15.9 | 36.4 ± 15.4 | <b>p=0.0001</b>   | 46.9 ± 14.8 | 39.5 ± 16.3 | <b>p=0.0057</b>   |
| Display a Condescending Attitude        | 52.7 ± 8.2  | 50.7 ± 9.2  | <b>p=0.0043</b>   | 54.9 ± 6.9  | 55.8 ± 8.9  | p=0.5229          |
| Display a Conforming Attitude           | 41.3 ± 7.9  | 42.6 ± 9.0  | p=0.0621          | 41.6 ± 9.0  | 38.3 ± 9.2  | <b>p=0.0343</b>   |
| Want Freedom of Choice                  | 59.3 ± 14.0 | 59.0 ± 13.1 | p=0.7774          | 62.0 ± 10.0 | 64.7 ± 10.7 | p=0.1254          |
| Display perfectionism                   | 72.4 ± 15.2 | 76.4 ± 14.7 | <b>p=0.0014</b>   | 68.2 ± 16.5 | 73.4 ± 13.1 | <b>p=0.0469</b>   |

Dif. = difference between genders. Values represent the arithmetical mean ± standard deviation. The statistical difference between lots was calculated with independent samples t-test. Displayed p value is two-tailed and statistically significant p values are bolded in the table.
